# Supplementary material
Source: PubMed Central journal article supplement (PMC3874239)
Supplement: NIHMS55610-supplement-1.pdf [file NIHMS55610-supplement-1.pdf]

## Supplementary information

### Inactivating *CUX1* mutations promote tumorigenesis

Chi C. Wong<sup>1,2</sup>, Inigo Martincorena<sup>3</sup>, Alistair G. Rust<sup>1</sup>, Mamunur Rashid<sup>1</sup>, Constantine Alifrangis<sup>4</sup>, Ludmil B. Alexandrov<sup>3</sup>, Jessamy C. Tiffen<sup>1</sup>, Christina Kober<sup>1</sup>, Chronic Myeloid Disorders Working Group of the International Cancer Genome Consortium<sup>5</sup>, Anthony R. Green<sup>2,6,7</sup>, Charles E. Massie<sup>2,6,7</sup>, Jyoti Nangalia<sup>2,6,7</sup>, Stella Lempidaki<sup>8</sup>, Hartmut Döhner<sup>9</sup>, Konstanze Döhner<sup>9</sup>, Sarah J. Bray<sup>8</sup>, Ultan McDermott<sup>4</sup>, Elli Papaemmanuil<sup>3</sup>, Peter J. Campbell<sup>2,3</sup> & David J. Adams<sup>1\*</sup>

<sup>1</sup>Experimental Cancer Genetics, Wellcome Trust Sanger Institute, Hinxton, Cambridge, CB10 1SA, UK. <sup>2</sup>Department of Haematology, University of Cambridge, Hills Road, Cambridge, CB2 0SP, UK.

<sup>3</sup>The Cancer Genome Project, Wellcome Trust Sanger Institute, Hinxton, Cambridge, CB10 1SA, UK.

<sup>4</sup>The Cancer Translation Project, Wellcome Trust Sanger Institute, Hinxton, Cambridge, CB10 1SA, UK. <sup>5</sup>See Supplementary Note for members and affiliations, <sup>6</sup>Cambridge Institute for Medical Research, University of Cambridge, Hills Road, Cambridge, CB2 0SP, UK. <sup>7</sup>Wellcome Trust/MRC Stem Cell Institute, University of Cambridge, Cambridge, UK. <sup>8</sup>Department of Physiology, Development and Neuroscience, University of Cambridge, CB2 3DY, UK. <sup>9</sup>Department of Internal Medicine III, University of Ulm, Albert-Einstein-Allee 23 89081, Ulm, Germany.

Supplementary Figure 1 | Characteristics of myeloid diseases cohorts.

Supplementary Figure 2 | PCR verification of transposon mobilization following plpC administration.

Supplementary Figure 3 | Pattern of insertion sites in mouse transposon tumors.

Supplementary Figure 4 | Verification of *Cux1-T2/Onc* splicing in transposon tumors.

Supplementary Figure 5 | Expression of *Cux1* transcripts in mouse transposon tumors.

Supplementary Figure 6 | Quantification of *Cux1* insertions within tumors.

Supplementary Figure 7 | Enrichment in proliferation pathway signaling genes following CUX1 knockdown by siRNA in LOUCY cells.

Supplementary Figure 8 | Histopathology of xenograft tumors.

Supplementary Figure 9 | Model for role of CUX1 in driving PI3K signaling.

Supplementary Figure 10 | CUX1 and PIK3IP1 status in human T-ALL cell lines.

Supplementary Figure 11 | Focal homozygous *CUX1* deletion in H2803 mesothelioma cells.

Supplementary Figure 12 | Sensitivity of CUX1-deficient cell lines to NVP-BEZ235 and MK2206.

## SUPPLEMENTARY NOTE

### Members of Chronic Myeloid Disorders Working Group of the International Cancer Genome Consortium

Luca Malcovati & Mario Cazzola, Fondazione IRCCS Policlinico San Matteo, University of Pavia, Pavia, Italy; Eva Hellstrom-Lindberg, Department of Haematology, Karolinska Institute, Stockholm, Sweden; David Bowen, St. James Institute of Oncology, St. James Hospital, Leeds, UK; Paresh Vyas, Weatherall Institute of Molecular Medicine, University of Oxford, UK; Carlo Gambacorti-Passerini, Department of Haematology, University of Milan Bicocca, Milan, Italy; Nicholas C. P. Cross, Faculty of Medicine, University of Southampton, Southampton, UK; Anthony R. Green, Department of Haematology, University of Cambridge, UK & Department of Haematology, Addenbrooke's Hospital, Cambridge, UK; Jacqueline Boulton, Nuffield Department of Clinical Laboratory Sciences, University of Oxford, UK.

### Role of *CUX1* in cancer

Higher levels of *CUX1* expression have been detected in breast<sup>1</sup>, pancreatic<sup>2</sup> and colon<sup>3</sup> cancer tissues and are associated with advanced tumor grade and aggressiveness, supporting an oncogenic role for *CUX1*. Additionally, transgenic mouse lines overexpressing Cux1<sup>p75</sup> or Cux1<sup>p110</sup> isoforms manifest an array of phenotypes including multi-organ organomegaly, kidney abnormalities, cancerous liver lesions, myeloproliferation and mammary tumors after long latency<sup>4-10</sup>. In contrast, mutations predicted to generate truncated CUX1<sup>p200</sup> and derivative CUX1<sup>p110</sup> proteins are expected to be transcriptionally inactive due to the absence of nuclear localization sequences near the C-terminal homeodomain<sup>11,12</sup>. In addition, knockdown of *CUX1* expression in human hematopoietic cells increased their engraftment capability in immunodeficient mice<sup>13</sup>, consistent with a tumor suppressive role for *CUX1*.

### Role of *CUX1* in T-ALL

Although our results were consistent with *CUX1* being a tumor suppressor, it was curious that transposon tumors with *Cux1* insertions had a T-ALL phenotype, yet *CUX1* mutations appear to be associated with myeloid malignancy in humans. Perhaps this may be ascribed to species differences, but notably 17/20 tumors with *Cux1* insertions also had prototypical insertions in potent T-ALL cancer genes such as *Notch1*, *Ikzf1* or *Pten* (see **Supplementary Fig. 3**), which can drive T-ALL development as independent lesions<sup>14-16</sup>. Interestingly however, *CUX1* truncation as a result of chromosomal translocation has been described in human T-ALL<sup>17</sup> and we detected two *CUX1* mutations by Sanger sequencing of *CUX1* coding exons in eight human T-ALL cell lines, including one heterozygous truncating variant (see **Supplementary Fig. 10**), suggesting a tumor suppressive role for *CUX1* in human T-ALL. In support, adoptive transfer experiments using *CUX1*-knockdown human hematopoietic cells revealed a role for *CUX1* in T-cell and myeloid lineages<sup>13</sup>.

### Supplementary Discussion

Other candidate tumor suppressor genes identified in our approach included *ARHGAP35*, *AMOT*, *MGA* and *LARP4B*. In the cases of *ARHGAP35* and *AMOT*, functional data consistent with these genes being tumor suppressors has been reported<sup>18,19</sup>, but until now they have not been shown to be recurrently mutated. *MGA*, encoding a Myc repressor<sup>20</sup>, has been found to be mutated in a small cohort of chronic lymphocytic leukemias<sup>21,22</sup>, but our study suggests a broader role for *MGA* in multiple cancer types (**Supplementary Table 8**). For *LARP4B*, which appears to be involved in protein translation<sup>23</sup>, no link with cancer has been postulated.

Remarkably, the majority of *CUX1* mutations in myeloid disorders were heterozygous. Although, we were unable to exclude silencing of the remaining *CUX1* allele by epigenetic mechanisms, residual *CUX1* expression is retained in -7/del(7q) AML cases<sup>13</sup>, concordant with our mouse tumor and cell line analysis. Whether *CUX1* operates predominantly as a haploinsufficient tumor suppressor in other tumor types requires further study. Interestingly, inactivating mutations in the histone methyltransferase *EZH2*, which resides distal to *CUX1* on chromosome 7 at 7q36, have also been identified in myeloid disorders<sup>24,25</sup>. Thus chromosome 7q harbors at least two myeloid tumor suppressor genes consistent with the presence of heterogeneous commonly deleted regions between del(7q) AML samples. *EZH2* mutations also confer poor prognosis in MDS, but in contrast to *CUX1*, homozygous *EZH2* mutations are prevalent<sup>24,26</sup>. Like *EZH2*, which has also been reported to be an oncogene<sup>27</sup>, our data reveal that *CUX1* is a member of a growing list of genes, that also includes *USP9X* (refs. 28, 29), *NKX2-1* (refs. 30, 31) and *ZBTB7A* (refs. 32, 33), that may function as both tumor suppressors and oncogenes. The effect of specific *CUX1* mutations is likely to depend on factors such as the expression pattern of *CUX1* isoforms and co-operating genetic aberrations in the target cell.

### Supplementary References

1. Michl, P. *et al.* CUTL1 is a target of TGF(beta) signaling that enhances cancer cell motility and invasiveness. *Cancer Cell* **7**, 521–532 (2005).
2. Ripka, S. *et al.* CUX1: target of Akt signalling and mediator of resistance to apoptosis in pancreatic cancer. *gut.bmj.com*
3. Muzny, D. M. *et al.* Comprehensive molecular characterization of human colon and rectal cancer. *Nature* **487**, 330–337 (2012).
4. Ledford, A. W. *et al.* Deregulated expression of the homeobox gene Cux-1 in transgenic mice results in downregulation of p27(kip1) expression during nephrogenesis, glomerular abnormalities, and multiorgan hyperplasia. *Dev. Biol.* **245**, 157–171 (2002).
5. Brantley, J. G., Sharma, M., Alcalay, N. I. & Heuvel, G. B. V. Cux-1 transgenic mice develop glomerulosclerosis and interstitial fibrosis. *Kidney Int.* **63**, 1240–1248 (2003).
6. Cadieux, C. *et al.* Transgenic mice expressing the p75 CCAAT-displacement protein/Cut homeobox isoform develop a myeloproliferative disease-like myeloid leukemia. *Cancer Res.* **66**, 9492–9501 (2006).
7. Cadieux, C. *et al.* Polycystic kidneys caused by sustained expression of Cux1 isoform p75. *J. Biol. Chem.* **283**, 13817–13824 (2008).
8. Cadieux, C. *et al.* Mouse mammary tumor virus p75 and p110 CUX1 transgenic mice develop mammary tumors of various histologic types. *Cancer Res.* **69**, 7188–7197 (2009).
9. Siam, R. *et al.* Transcriptional activation of the Lats1 tumor suppressor gene in tumors of CUX1 transgenic mice. *Mol. Cancer* **8**, 60 (2009).
10. Vanden Heuvel, G. B. *et al.* Hepatomegaly in transgenic mice expressing the homeobox gene Cux-1. *Mol. Carcinog.* **43**, 18–30 (2005).
11. Ellis, T. The transcriptional repressor CDP (Cutl1) is essential for epithelial cell differentiation of the lung and the hair follicle. *Genes Dev.* **15**, 2307–2319 (2001).
12. Luong, M. X. *et al.* Genetic Ablation of the CDP/Cux Protein C Terminus Results in Hair Cycle Defects and Reduced Male Fertility. *Mol. Cell. Biol.* **22**, 1424–1437 (2002).
13. McNerney, M. E. *et al.* CUX1 is a haploinsufficient tumor suppressor gene on chromosome 7 frequently inactivated in acute myeloid leukemia. *Blood* **121**, 975–983 (2013).
14. Pear, W. S. *et al.* Exclusive development of T cell neoplasms in mice transplanted with bone marrow expressing activated Notch alleles. *J. Exp. Med.* **183**, 2283–2291 (1996).
15. Winandy, S., Wu, P. & Georgopoulos, K. A dominant mutation in the Ikaros gene leads to rapid development of leukemia and lymphoma. *Cell* **83**, 289–299 (1995).

16. Suzuki, A. *et al.* T Cell-Specific Loss of Pten Leads to Defects in Central and Peripheral Tolerance. *Immunity* **14**, 523–534 (2001).
17. Wasag, B., Lierman, E., Meeus, P., Cools, J. & Vandenberghe, P. The kinase inhibitor TKI258 is active against the novel CUX1-FGFR1 fusion detected in a patient with T-lymphoblastic leukemia/lymphoma and t(7;8)(q22;p11). *Haematologica* **96**, 922–926 (2011).
18. Ludwig, K. & Parsons, S. J. The Tumor Suppressor, p190RhoGAP, Differentially Initiates Apoptosis and Confers Docetaxel Sensitivity to Breast Cancer Cells. *Genes & Cancer* **2**, 20–30 (2011).
19. Zhao, B. *et al.* Angiomotin is a novel Hippo pathway component that inhibits YAP oncoprotein. *Genes Dev.* **25**, 51–63 (2011).
20. Hurlin, P. J. Mga, a dual-specificity transcription factor that interacts with Max and contains a T-domain DNA-binding motif. *EMBO J.* **18**, 7019–7028 (1999).
21. Edelmann, J. *et al.* High-resolution genomic profiling of chronic lymphocytic leukemia reveals new recurrent genomic alterations. *Blood* **120**, 4783–4794 (2012).
22. De Paoli, L. *et al.* MGA, a suppressor of MYC, is recurrently inactivated in high risk chronic lymphocytic leukemia. *Leuk. Lymphoma* **54**, 1087–1090 (2013).
23. Schäffler, K. *et al.* A stimulatory role for the La-related protein 4B in translation. *RNA* **16**, 1488–1499 (2010).
24. Ernst, T. *et al.* Inactivating mutations of the histone methyltransferase gene EZH2 in myeloid disorders. *Nat. Genet.* **42**, 722–726 (2010).
25. Nikoloski, G. *et al.* Somatic mutations of the histone methyltransferase gene EZH2 in myelodysplastic syndromes. *Nat. Genet.* **42**, 665–667 (2010).
26. Bejar, R. *et al.* Clinical effect of point mutations in myelodysplastic syndromes. *N Engl J Med* **364**, 2496–2506 (2011).
27. Xu, K. *et al.* EZH2 Oncogenic Activity in Castration-Resistant Prostate Cancer Cells Is Polycomb-Independent. *Science* **338**, 1465–1469 (2012).
28. Pérez-Mancera, P. A. *et al.* The deubiquitinase USP9X suppresses pancreatic ductal adenocarcinoma. *Nature* **486**, 266–270 (2012).
29. Schwickart, M. *et al.* Deubiquitinase USP9X stabilizes MCL1 and promotes tumour cell survival. *Nature* **463**, 103–107 (2009).
30. Winslow, M. M. *et al.* Suppression of lung adenocarcinoma progression by Nkx2-1. *Nature* **473**, 101–104 (2011).
31. Weir, B. A. *et al.* Characterizing the cancer genome in lung adenocarcinoma. *Nature* **450**, 893–898 (2007).
32. Wang, G. *et al.* Zbtb7a suppresses prostate cancer through repression of a Sox9-dependent pathway for cellular senescence bypass and tumor invasion. *Nat. Genet.* **45**, 739–746 (2013).
33. Maeda, T. *et al.* Role of the proto-oncogene Pokemon in cellular transformation and ARF repression. *Nature* **433**, 278–285 (2005).

a

### Diagnoses of MPN cases (n = 151)

48 polycythemia vera; 62 essential thrombocythemia; 39 myelofibrosis; 2 MPN unclassified

### Characteristics of AML cohort (n = 1630)

Average age = 48.2 years

Trial distribution: AMLSG 07-04 = 49%; AMLSG 98A = 41%; AMLSG 98B = 10%

Sex = 53% male

AML karyotype: t(15;17) = 4%; t(8;21) = 4%; inv(16)/t(16;16) = 5%; unsuccessful = 9%

-7/del(7q) status: -7/del(7q), n = 139; no -7/del(7q) n = 1338; no karyotype n = 153

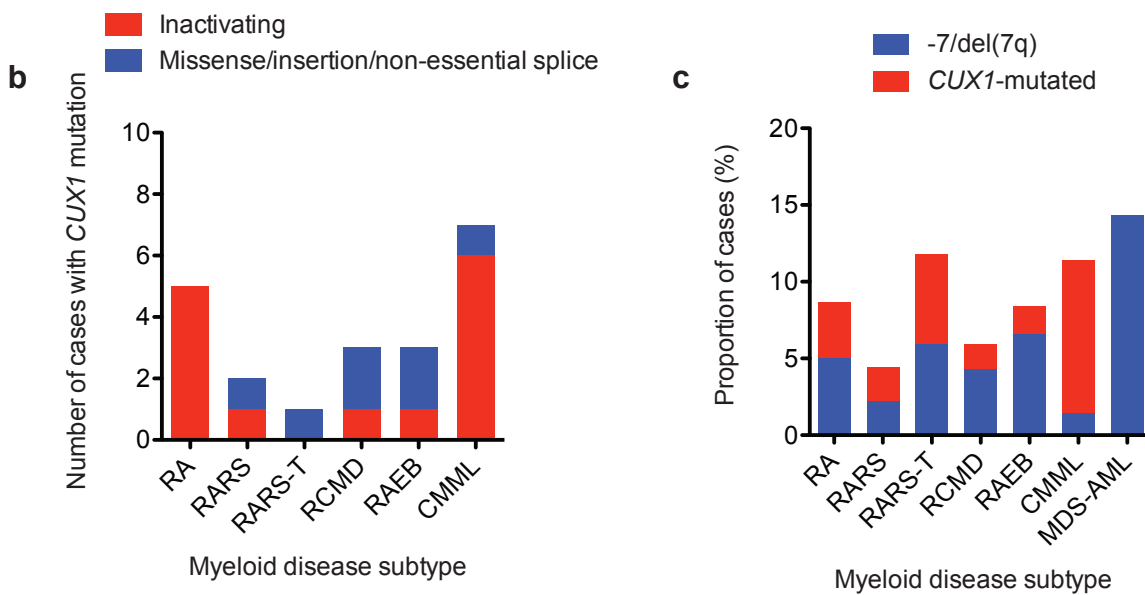

### Supplementary Figure 1 | Characteristics of myeloid diseases cohorts.

(a) MPN subtype of 151 sequencing cases and characteristics of AML patient cohort (n = 1630).

(b) Distribution of *CUX1* mutations\* across MDS and MDS/MPN subtypes is shown.

(c) Proportion of cases with *CUX1* or -7/del(7q) lesions according to disease subtype is shown.

RA, Refractory anemia; RARS, Refractory anemia with ring sideroblasts;

RARS-T, Refractory anemia with ring sideroblasts and thrombocytosis;

RCMD, Refractory cytopenia with multilineage dysplasia;

RAEB, Refractory anemia with excess blasts;

CMML, Chronic myelomonocytic leukemia;

MDS-AML, Acute myeloid leukemia with myelodysplasia-related changes

\* Papaemmanuil, E. et al. Clinical and biological implications of driver mutations in myelodysplastic syndromes. *Blood* (2013). doi:10.1182/blood-2013-08-518886

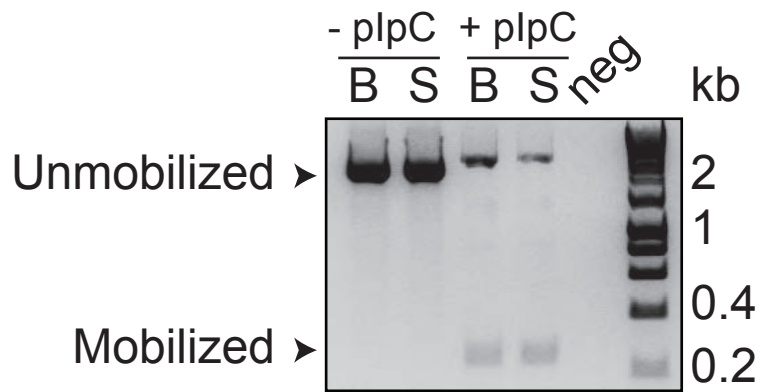

**Supplementary Figure 2 | PCR verification of transposon mobilization following plpC administration.**

~2.2-kb and 225-bp products indicate presence of unmobilized and mobilized transposons respectively. B, bone marrow ; S, spleen; neg, no DNA.

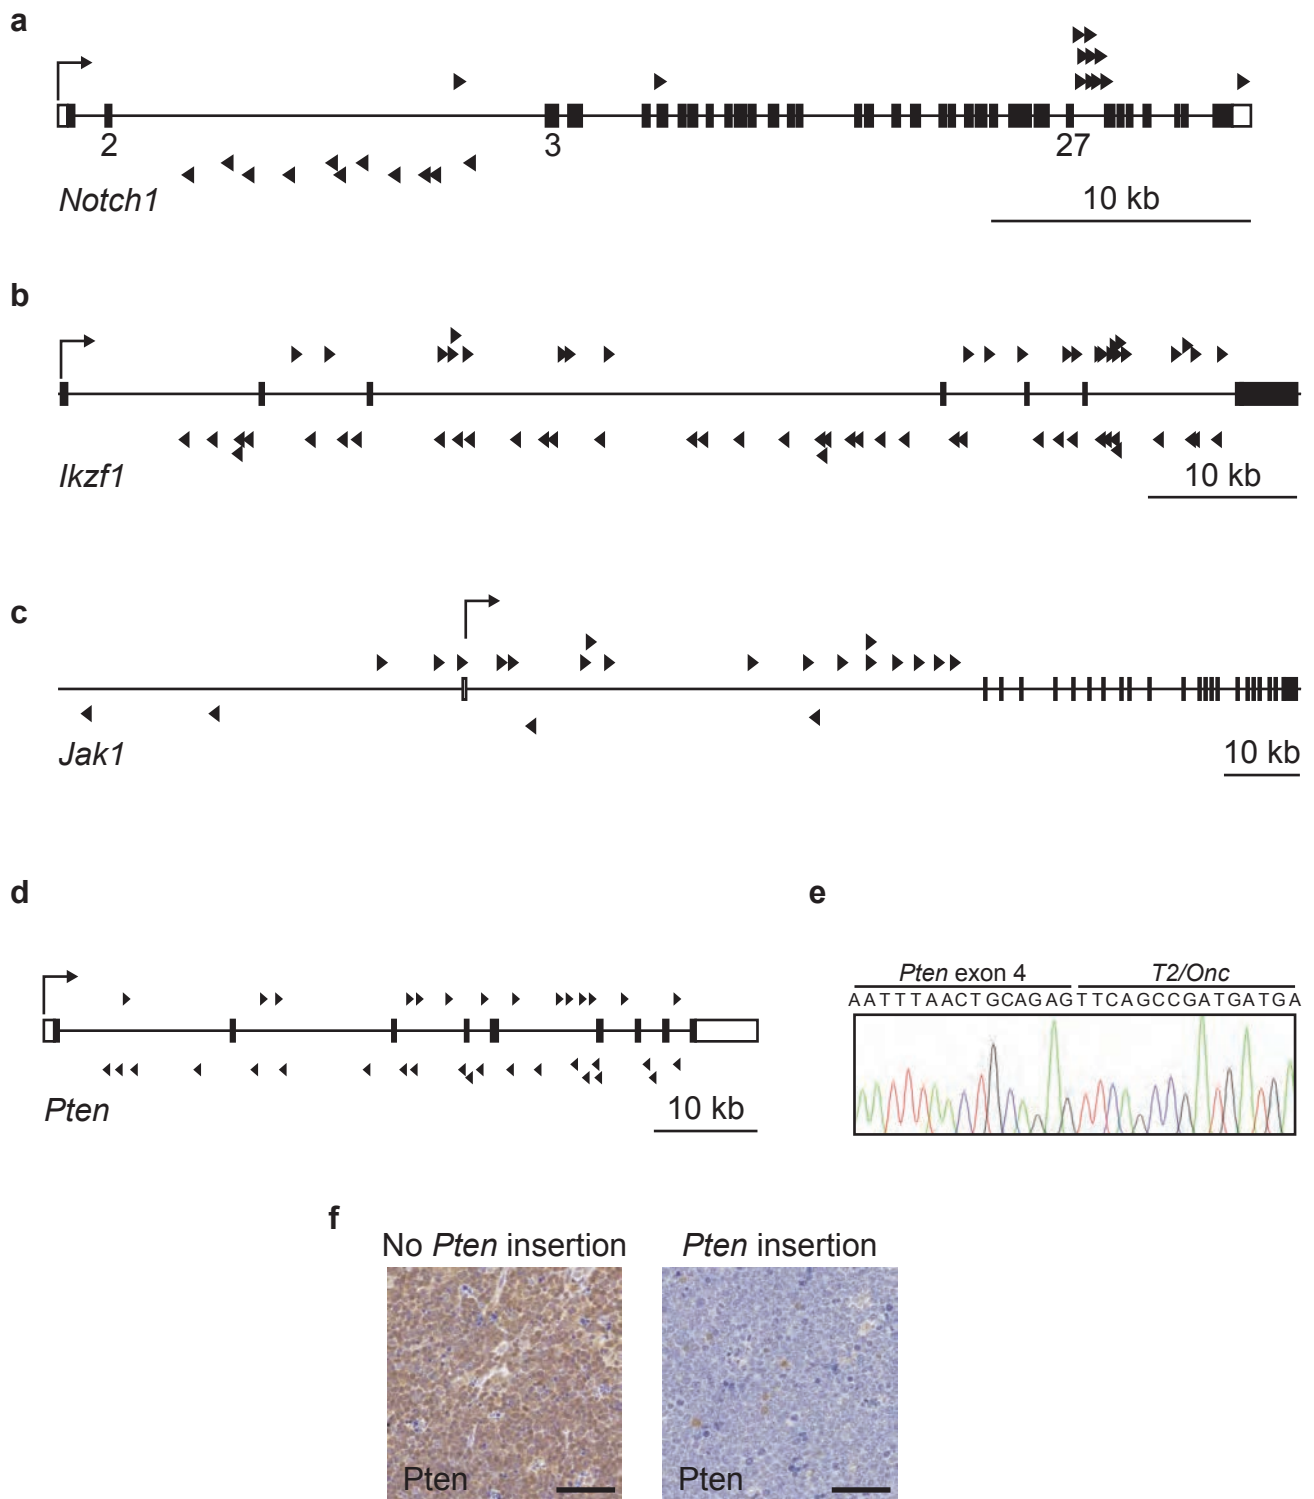

**Supplementary Figure 3 | Pattern of insertion sites in mouse transposon tumors.**

(a, b, c) Transposon insertions within *Notch1* (a), *Ikzf1* (b) and *Jak1* (c) are shown by arrowheads. Direction of gene transcription is left-to-right. White boxes, non-coding exons; black boxes, coding exons. Direction of arrowheads indicate orientation of transposons. Insertions in *Notch1* and *Jak1* are predicted to be activating compared to inactivating insertions in *Ikzf1*. (d) Sense and antisense insertions in *Pten*. (e) Detection of splicing from *Pten* exon 4 to *T2/Onc* transposon, leading to *Pten* truncation. (f) Absence of *Pten* staining by immunohistochemistry in a transposon thymic tumor with *Pten* insertion. Scale bar = 50  $\mu$ m.

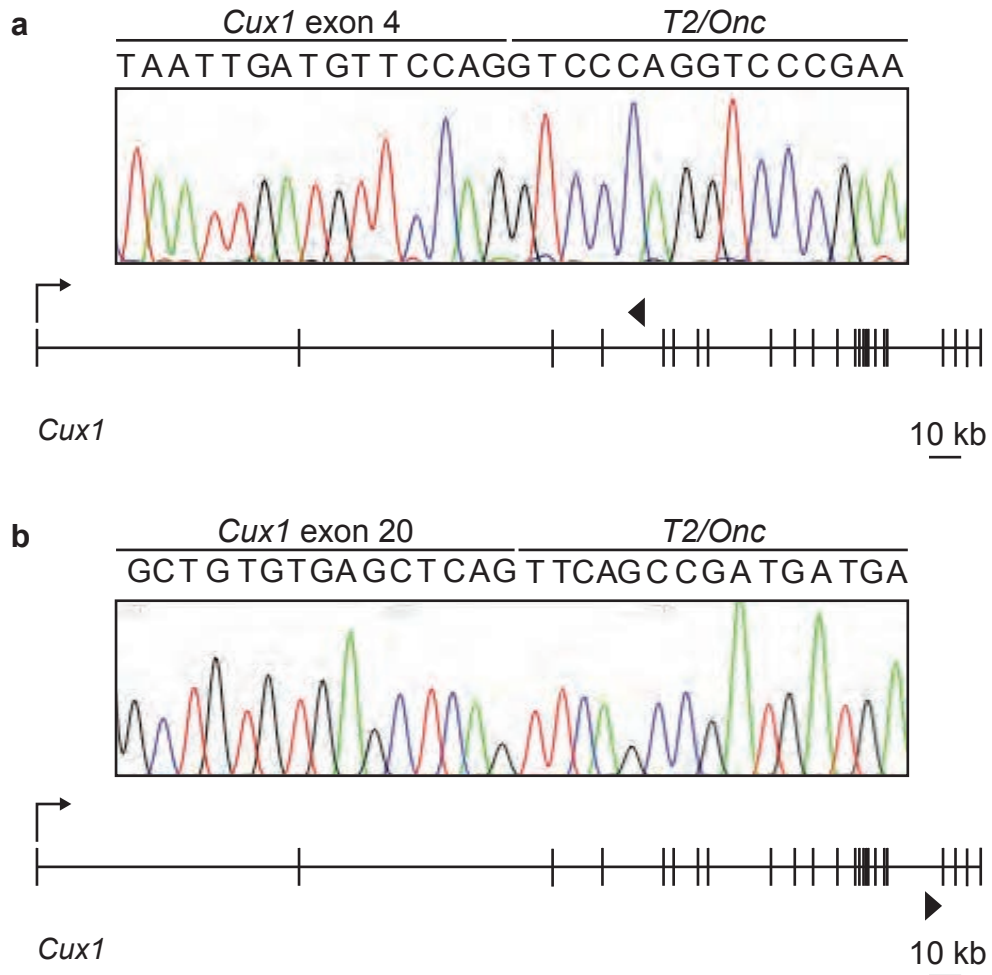

**Supplementary Figure 4 | Verification of *Cux1*-*T2/Onc* splicing in transposon tumors.** Splicing events involving *Cux1* exons 4 (**a**) and 20 (**b**) to the *T2/Onc* transposon were detected by sequencing of products obtained by RT-PCR using RNA from two transposon tumors. The location and direction of transposon insertions within *Cux1* are depicted below each sequencing trace.



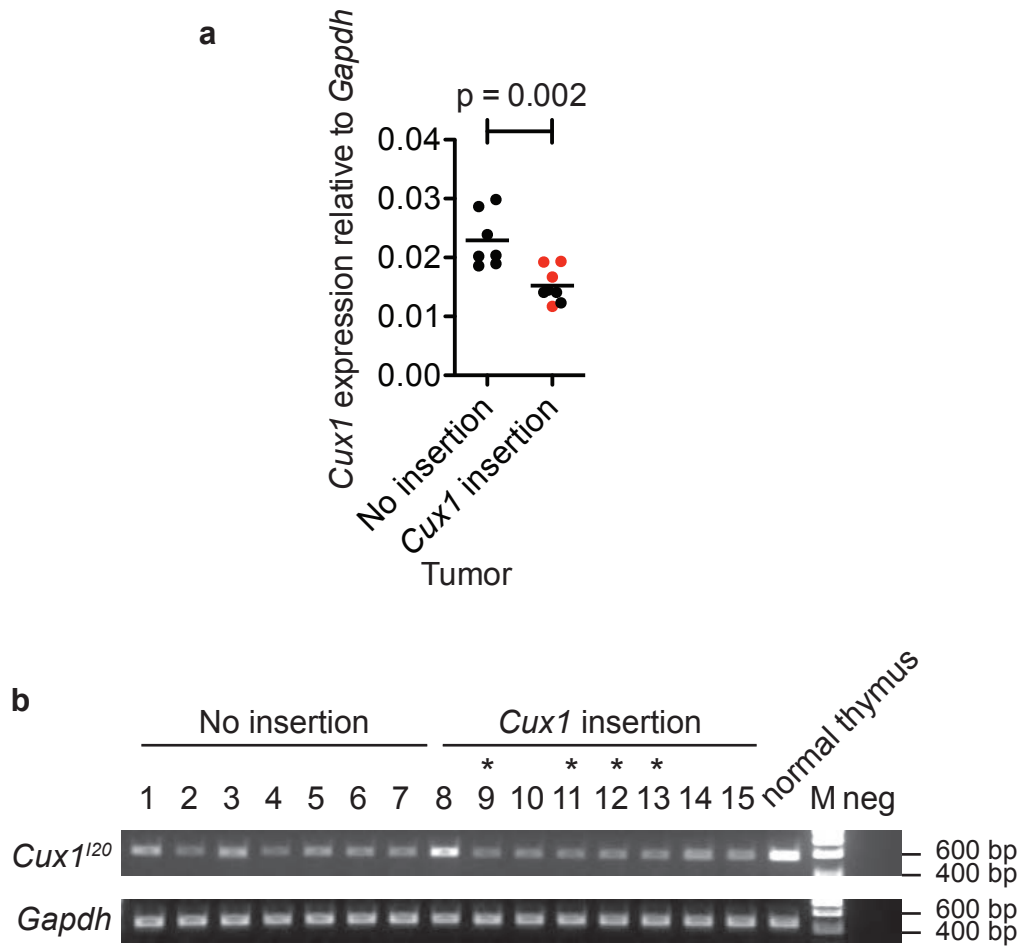

**Supplementary Figure 5 | Expression of *Cux1* transcripts in mouse transposon tumors.**

**(a)** Reduction in *Cux1* expression in mouse transposon thymic tumors by qRT-PCR using Cux22F and Cux23R primers. Location of primers is shown in Fig. 2d. Primers detect all (*p75*, *p110* and *p200*) *Cux1* isoforms. Data show mean of triplicate measurements. Bar, group mean;  $p = 0.002$ , t-test. Red points show tumors with two *Cux1* insertions. **(b)** Semi-quantitative RT-PCR was performed on RNA isolated from mouse transposon tumors with and without *Cux1* insertions and normal thymus to detect *Cux1*<sup>I20</sup> encoding *Cux1*<sup>p75</sup>. *Gapdh* expression was assessed as a control. M, DNA marker; neg, no template control. \* indicates tumors with *Cux1* insertions in a forward orientation.

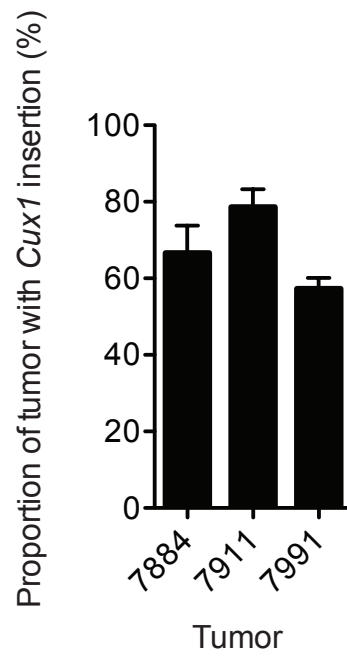

**Supplementary Figure 6 | Quantification of *Cux1* insertions within tumors.**

Quantitative PCR was performed on genomic DNA from three tumors to assess frequency of specific *Cux1* insertion events within each sample. Data show mean and s.e.m. from triplicate assessments.

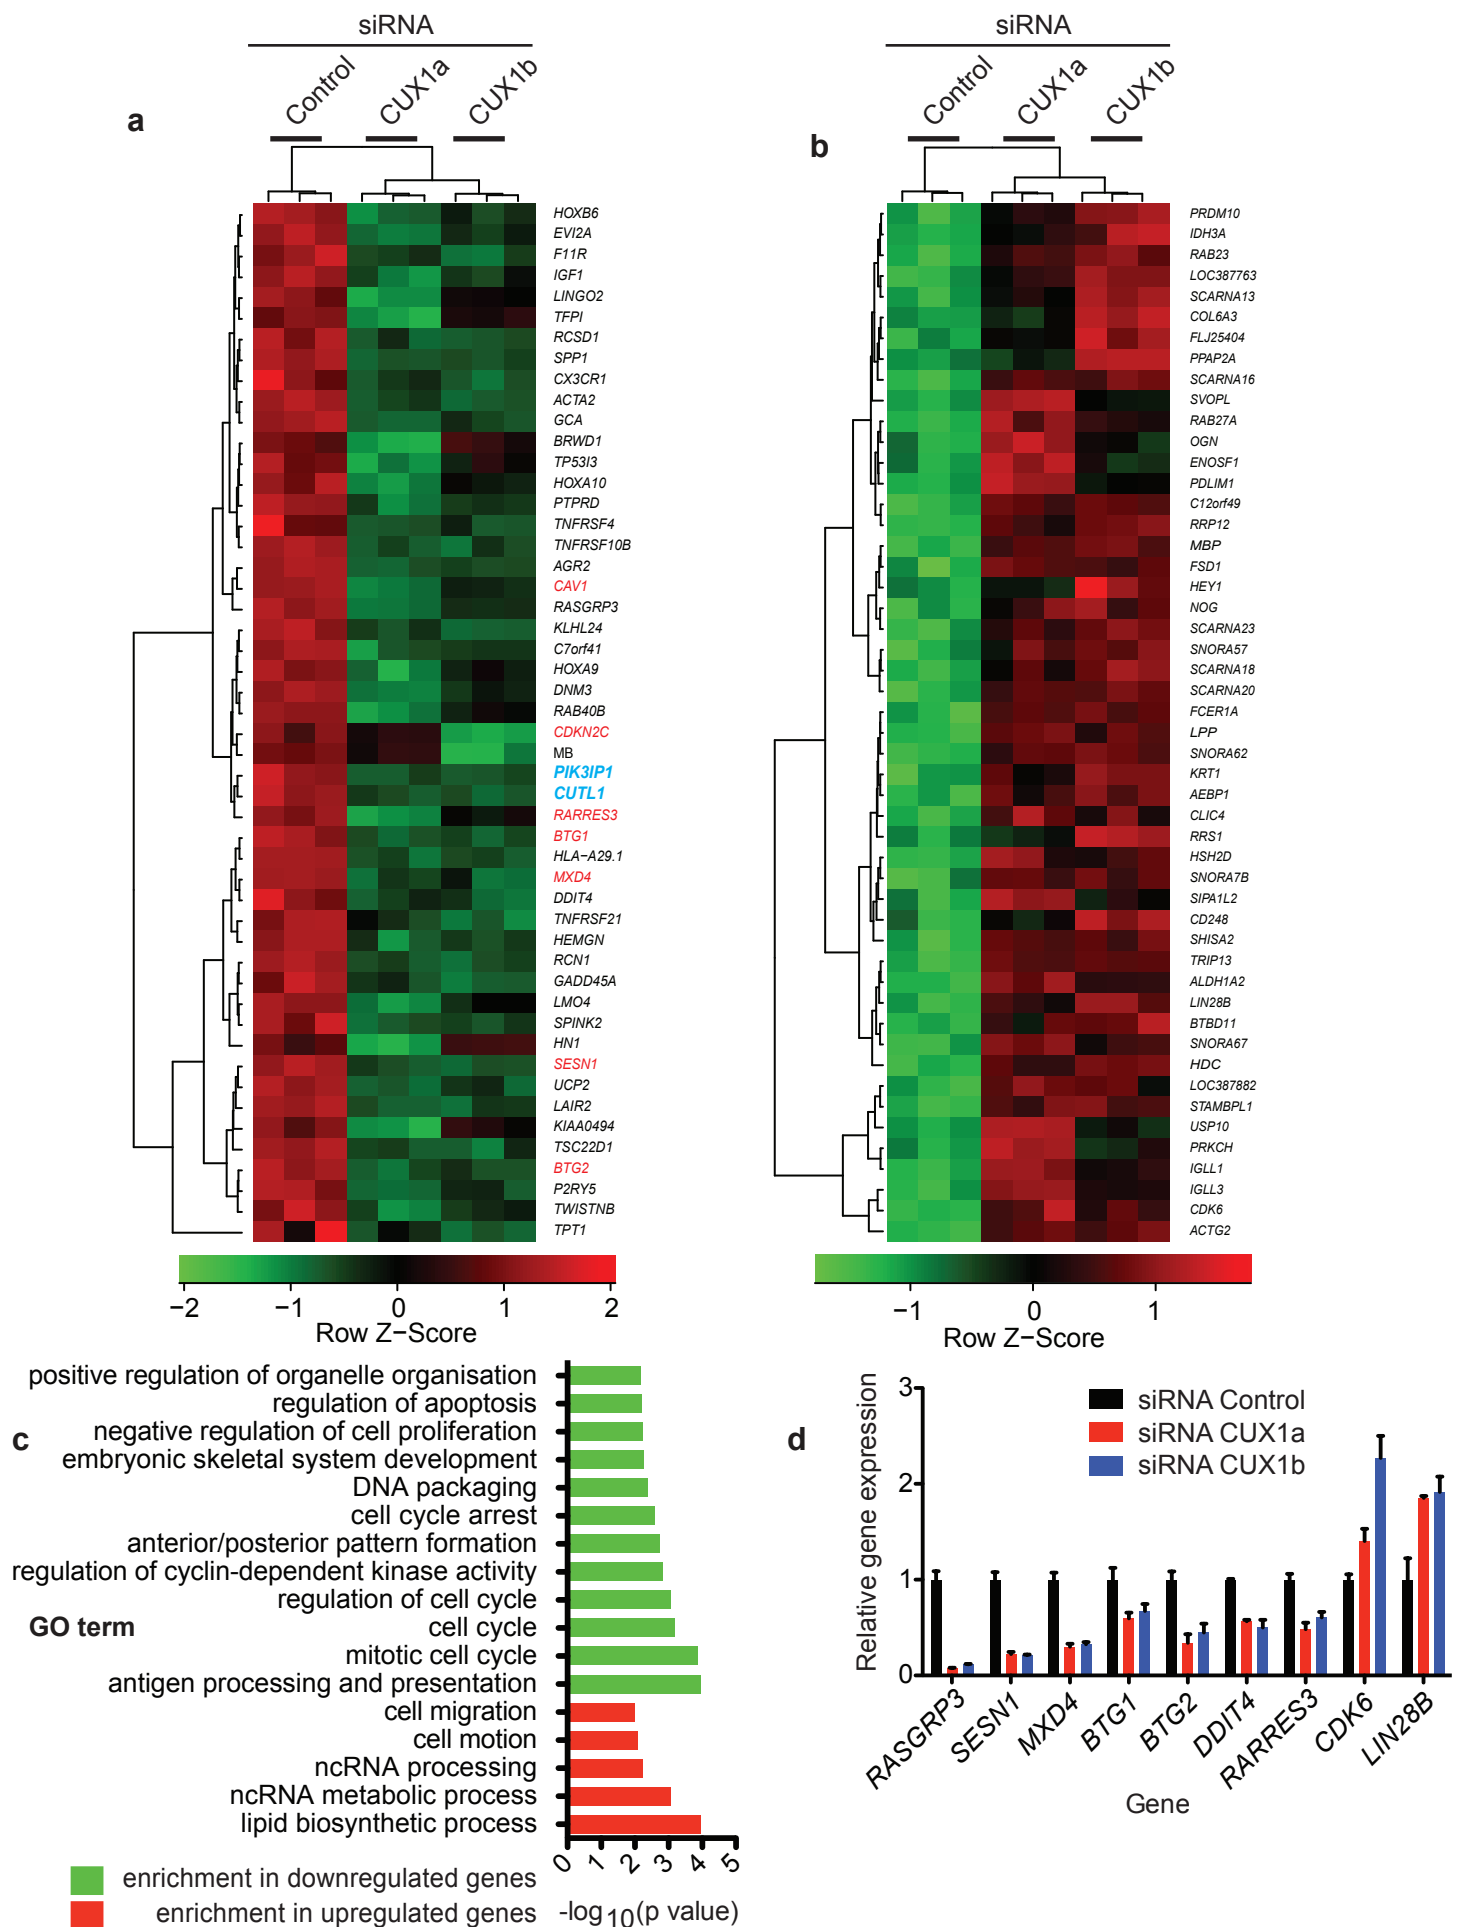

**Supplementary Figure 7 | Enrichment in proliferation pathway signaling genes following CUX1 knockdown by siRNA in LOUCY cells.**

(a, b) Heat maps showing uncensored hierarchical clustering of top 50 downregulated (a) and upregulated (b) genes following CUX1 knockdown using CUX1a and CUX1b siRNAs compared to control (n =3). Subset of proliferation pathway genes highlighted in red. CUX1 (CUTL1) and PIK3IP1 highlighted in blue. (c) Gene ontology (GO) analysis of dysregulated genes using DAVID. (d) Validation by qRT-PCR of CUX1-knockdown transcriptome profiling results. Data represent mean + s.d. (n =2).

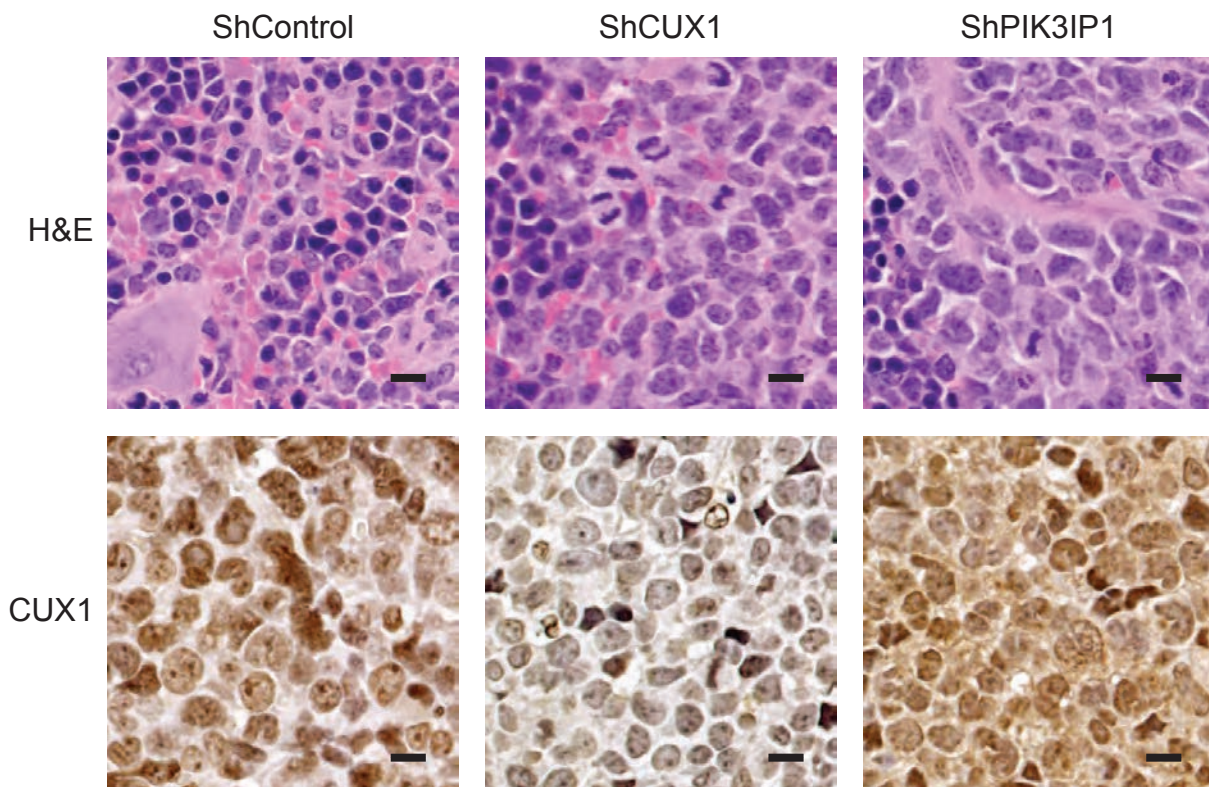

**Supplementary Figure 8 | Histopathology of xenograft tumors.**

Top: spleen sections from NOD-SCID mice injected with KE37 cells transduced with indicated knockdown vectors were stained with haematoxylin and eosin (H&E).

Bottom: tumor xenografts were processed for immunohistochemical staining with anti-Cux1 antibodies. Scale bar 10 µm.

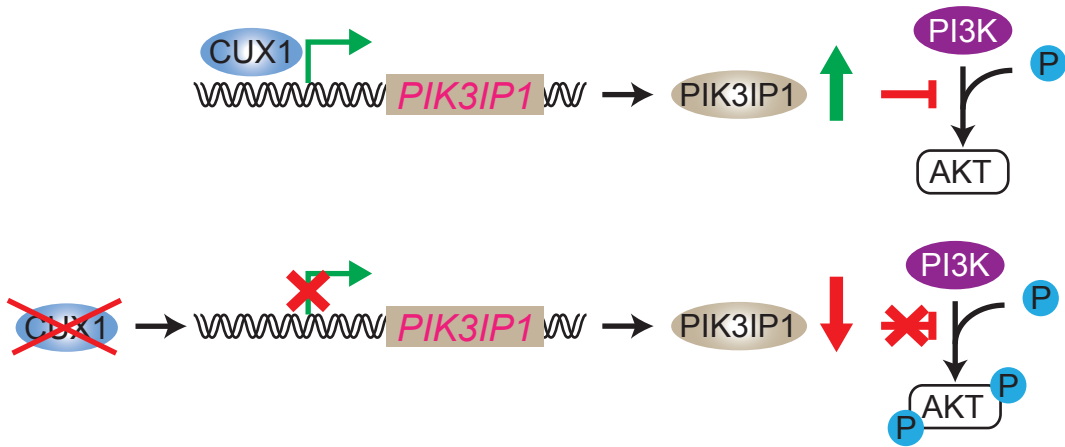

Supplementary Figure 9 | Model for role of CUX1 in driving PI3K signaling.

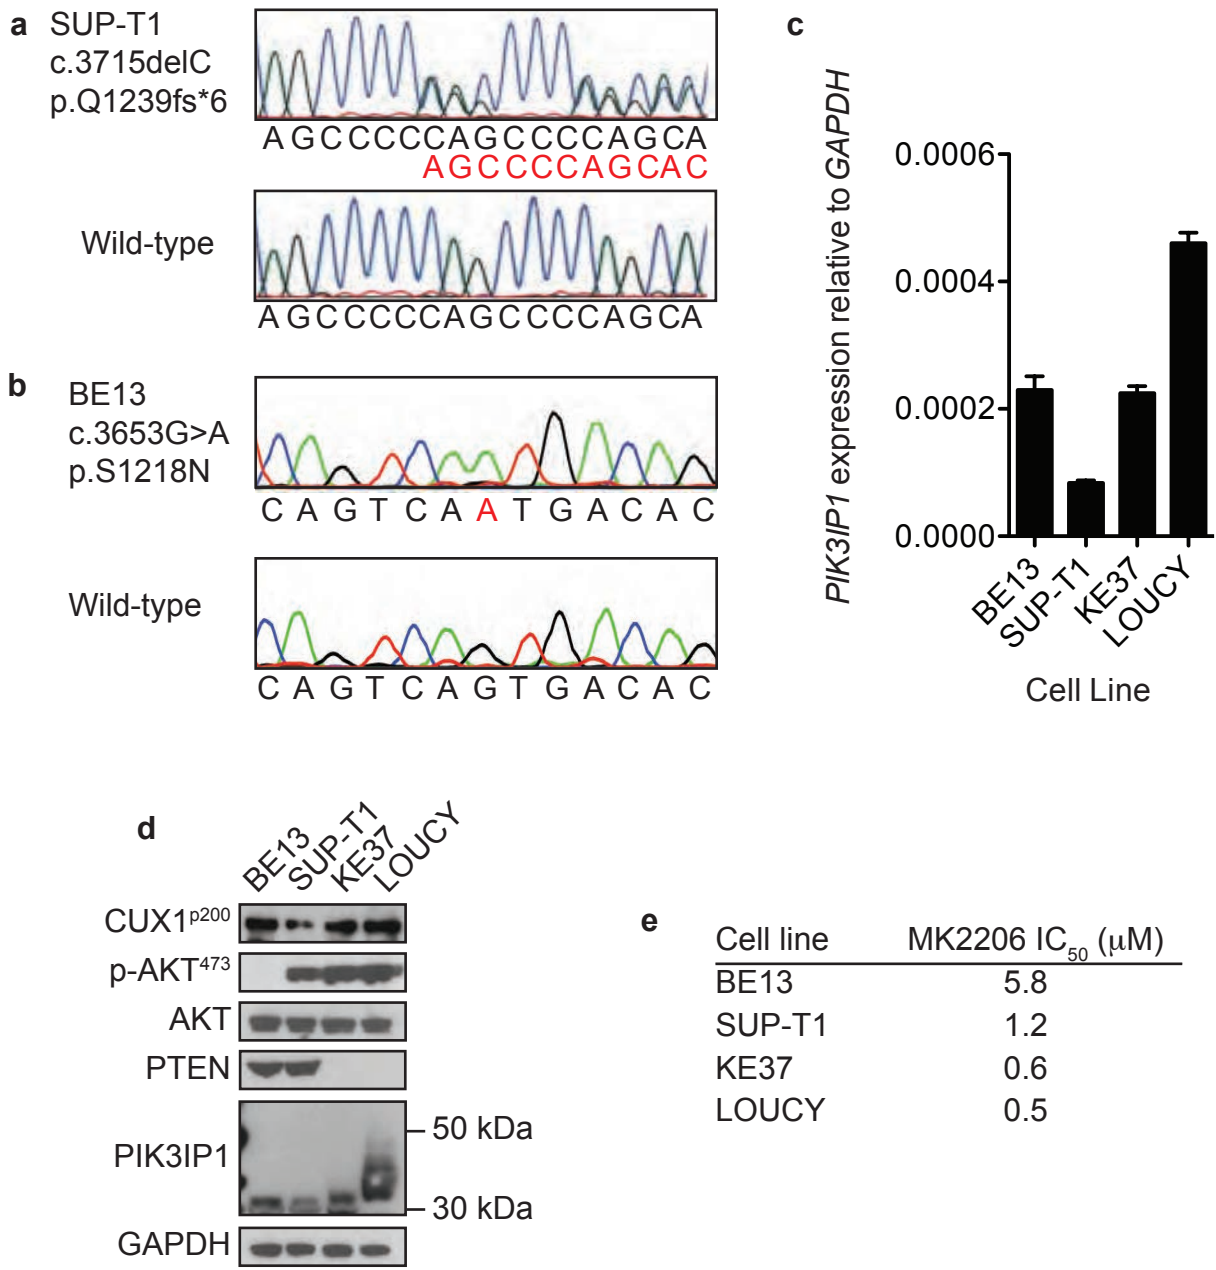

### Supplementary Figure 10 | CUX1 and PIK3IP1 status in human T-ALL cell lines.

(a) The SUP-T1 line carries a heterozygous frameshift deletion mutation (c.3715delC) predicted to truncate CUX1. (b) The BE13 line harbors a homozygous missense change (c.3653G>A) predicted to generate p.S1218N change. (c) *PIK3IP1* expression was assessed by qRT-PCR in the indicated cell lines. Data are mean and s.e.m. of triplicate assessments. (d) Immunoblotting showing reduction in CUX1 and PIK3IP1 in SUP-T1 cells. PIK3IP1 shows marked retarded migration in LOUCY cells, attributable to protein glycosylation\*. (e) Sensitivity of indicated cell lines to MK2206. IC<sub>50</sub> values are shown. KE37 and LOUCY cells are PTEN-null and are sensitive to AKT inhibition. BE13 and SUP-T1 cells are *PTEN* wild-type. BE13 cells showed higher PIK3IP1 expression and undetectable phospho-AKT levels compared to SUP-T1 cells, suggesting that the homozygous missense *CUX1* mutation in these cells is inert and does not influence PIK3IP1 expression.

\* Halim A, Nilsson J, Rüetschi U, Hesse C, Larson G. Human urinary glycoproteomics; attachment site specific analysis of N- and O-linked glycosylations by CID and ECD. *Mol Cell Proteomics*. 11: 10.1074/mcp.M111.013649, 1–17 (2012).

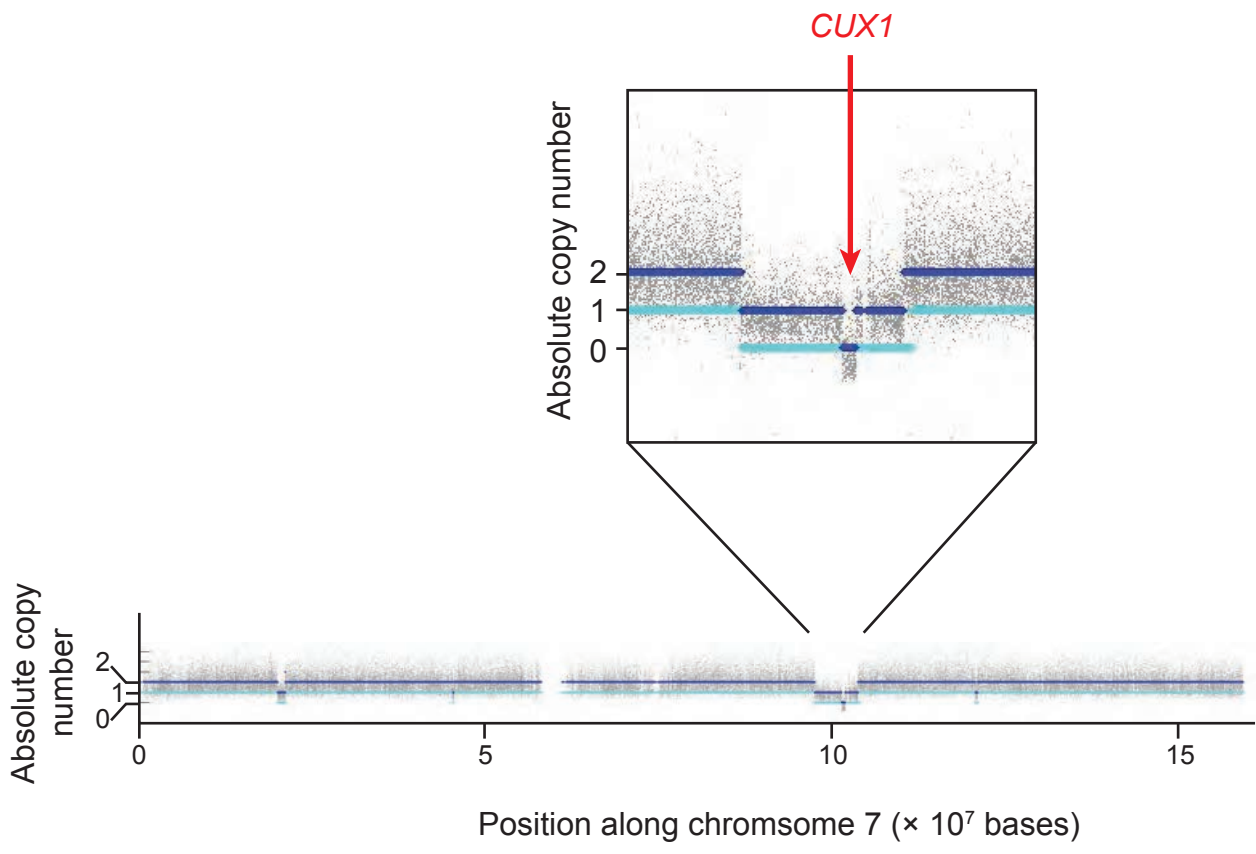

**Supplementary Figure 11 | Focal homozygous *CUX1* deletion in H2803 mesothelioma cells.** Absolute copy number plot of chromosome 7 using Affymetrix SNP 6.0 data demonstrating focal homozygous genomic deletion encompassing *CUX1* alone (dark blue line).

| Cell line       | NVP-BEZ235 IC <sub>50</sub> (nM) | Cell line | MK2206 IC <sub>50</sub> (μM) |
|-----------------|----------------------------------|-----------|------------------------------|
| KE37::shControl | 20.0                             | MSTO-211H | 0.3                          |
| KE37::shCUX1    | 8.0                              | H2803     | 1.0                          |
|                 |                                  | MFE-280   | 1.4                          |
|                 |                                  | H2810     | 8.6                          |
|                 |                                  | H2804     | 11.6                         |
|                 |                                  | NCI-H28   | 28.3                         |
|                 |                                  | IST-MES1  | 36.8                         |

**Supplementary Figure 12 | Sensitivity of CUX1-deficient cell lines to NVP-BEZ235 and MK2206.**

Dose response curves were derived from viability measurements of indicated cell lines after treatment with NVP-BEV235 or MK2206 drugs and used to calculate IC<sub>50</sub> values.
